# Supplementary material for: Defect stabilized gold atoms on graphene as potential catalysts for ethylene epoxidation: a first-principles investigation
Source: Royal Society of Chemistry journal article supplement (doi:10.1039/c5cy01619c), 2015-11-24
Supplement: c5cy01619c1.pdf [file c5cy01619c1.pdf]

## **Supporting Information**

# Defect Stabilized Gold Atoms on Graphene as Potential Catalysts for Ethylene Epoxidation: A First-principles Investigation

*Xin Liu*<sup>†,\*</sup>, *Yang Yang*<sup>†</sup>, *Minmin Chu*<sup>†</sup>, *Ting Duan*<sup>†</sup>, *Changgong Meng*<sup>†</sup> and *Yu Han*<sup>‡,\*</sup>

<sup>†</sup> School of Chemistry, State Key Laboratory of Fine Chemicals, Dalian University of Technology, Dalian, 116024, P. R. China.

<sup>‡</sup> Physical Sciences and Engineering Division, Advanced Membranes and Porous Materials Center, King Abdullah University of Science and Technology, Thuwal, 23955-6900, Saudi Arabia

---

\*Corresponding Authors:

Dr. Xin Liu and Prof. Yu Han

Tel: +86-411-84986343(X. L.); +966-2-8082407 (Y. H.)

Email: xliu@dlut.edu.cn (X. L.); yu.han@kaust.edu.sa (Y. H.)

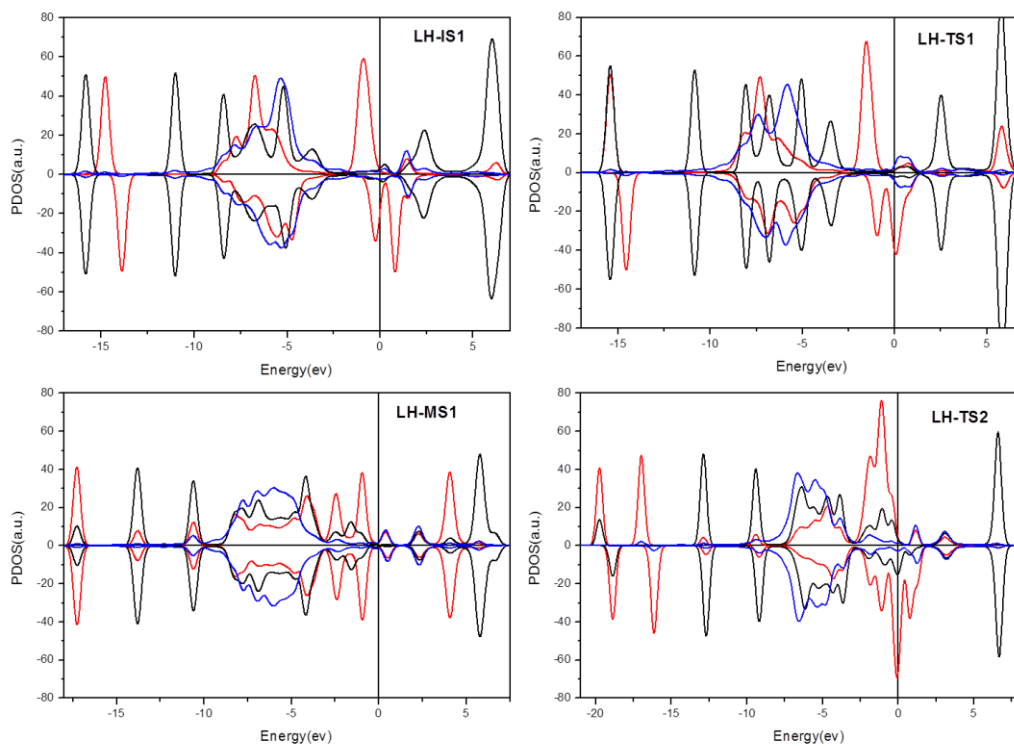

Figure S1. DOS of EE, O<sub>2</sub> and Au of AuSV at EP-IS1, EP-TS1, EP-MS1 and EP-TS2. The DOS curves of EE-sp, O<sub>2</sub>-sp and Au-d states are in black, red and blue, respectively. The DOS plots were aligned by the calculated Fermi level.
